# Supplementary material
Source: MDPI journal article supplement (https://www.mdpi.com/2304-6732/6/4/125)
Supplement: s1 [file s1]

# Synchronization of mutually delay-coupled nonidentical quantum cascade lasers: supplementary informations

Thomas Erneux

Université Libre de Bruxelles, Optique Nonlinéaire Théorique,  
Campus Plaine, C.P. 231, 1050 Bruxelles, Belgium

Daan Lenstra

Institute of Photonics Integration, Eindhoven University of  
Technology, P.O. Box 513, 5600MB Eindhoven, The Netherlands

## Contents

|          |                                                                     |          |
|----------|---------------------------------------------------------------------|----------|
| <b>1</b> | <b>Derivation of the coupled Adler delay differential equations</b> | <b>1</b> |
| <b>2</b> | <b>Compound Laser Modes if <math>P_2/P_1 \ll 1</math></b>           | <b>3</b> |
| <b>3</b> | <b>Stability of the CLMs if <math>P_2/P_1 \ll 1</math></b>          | <b>5</b> |
| <b>4</b> | <b>The critical case if <math>P_2/P_1 \rightarrow 0</math></b>      | <b>7</b> |

## 1 Derivation of the coupled Adler delay differential equations

We assume that both lasers are operating above threshold. The laser equations consist of six equations for the amplitudes and phases of the laser electrical fields,  $E_j = R_j \exp(i\Phi_j)$  ( $j = 1, 2$ ), and the carrier densities  $N_1$  and  $N_2$  [1]. They are given by

$$R_1' = N_1 R_1 + \varepsilon R_2(t - \tau) \cos(\theta + \Phi_2(t - \tau) - \Phi_1 - C), \quad (1)$$

$$\Phi_1' = -\frac{\Delta}{2} + \alpha N_1 + \varepsilon \frac{R_2(t - \tau)}{R_1} \sin(\theta + \Phi_2(t - \tau) - \Phi_1 - C), \quad (2)$$

$$TN_1' = P_1 - N_1 - (1 + 2N_1)R_1^2, \quad (3)$$

$$R_2' = N_2 R_2 + \varepsilon R_1(t - \tau) \cos(\theta + \Phi_1(t - \tau) - \Phi_2 - C), \quad (4)$$

$$\Phi_2' = \frac{\Delta}{2} + \alpha N_2 + \varepsilon \frac{R_1(t - \tau)}{R_2} \sin(\theta + \Phi_1(t - \tau) - \Phi_2 - C), \quad (5)$$

$$TN_2' = P_2 - N_2 - (1 + 2N_2)R_2^2. \quad (6)$$

We assume weak detunings and large delays and scale  $\Delta$  and  $\tau$  as

$$\Delta = \varepsilon \Delta_1 \text{ and } \tau = \varepsilon^{-1} \tau_1 \quad (7)$$

where  $\Delta_1$  and  $\tau_1$  are  $O(1)$  quantities. If  $\varepsilon = 0$ , we recover the rate equations for two solitary lasers. If  $P_j > 0$ , they approach their steady state values  $(R_j, N_j) = (\sqrt{P_j}, 0)$  on the  $t$  time scale. If  $0 < \varepsilon \ll 1$ , we note from Eq. (2) and (5) with  $N_j = O(\varepsilon)$  that  $\Phi'_j = O(\varepsilon)$ . This means that the evolution of the phases is slow compared to  $R_j$  and  $N_j$ . It motivates to look for an asymptotic solution that depends on two distinct time scales, namely  $t$  and  $s \equiv \varepsilon t$ . Specifically, we seek a solution of the form

$$R_j(t, s, \varepsilon) = \sqrt{P_j} + \varepsilon R_{j1}(t, s) + \dots, \quad (8)$$

$$N_j(t, s, \varepsilon) = \varepsilon N_{j1}(t, s) + \dots \quad (9)$$

$$\Phi_j(t, s, \varepsilon) = \Phi_{j0}(t, s) + \varepsilon \Phi_{j1}(t, s) + \dots \quad (10)$$

The assumption of two independent times requires the chain rule

$$\frac{dY}{dt} = Y_t + \varepsilon Y_s \quad (11)$$

where the subscripts  $t$  and  $s$  mean partial derivatives with respect to  $t$  and  $s$ . The leading order problem is  $O(1)$  and provides an equation for  $\Phi_{j0}$  given by

$$\Phi_{j0t} = 0 \quad (j = 1, 2) \quad (12)$$

which implies that  $\Phi_{j0} = \Phi_{j0}(s)$  is an unknown function of  $s$ . The next problem is  $O(\varepsilon)$  and is ( $j = 1, 2$ )

$$R_{j1t} - N_{j1}\sqrt{P_j} = \sqrt{P_{3-j}} \cos(\theta + \Phi_{3-j0}(s - \tau_1) - \Phi_{j0}(s) - C) \quad (13)$$

$$TN_{j1t} + 2\sqrt{P_j}R_{j1} + (1 + 2P_j)N_{j1} = 0. \quad (14)$$

Because the right hand side of Eq. (13) is a slowly varying function of  $s$ , the solution of Eqs. (13) and (14) quickly approach their quasi steady state values on the  $t$  time scale:

$$N_{j1} = -\sqrt{\frac{P_{3-j}}{P_j}} \cos(\theta + \Phi_{3-j0}(s - \tau_1) - \Phi_{j0}(s) - C), \quad (15)$$

$$R_{j1} = -\frac{1}{2\sqrt{P_j}}(1 + 2P_j)N_{j1}. \quad (16)$$

We next consider the equation for  $\Phi_{j1}$  ( $j = 1, 2$ )

$$\begin{aligned} \Phi_{j1t} &= F_j \equiv \mp \frac{\Delta_1}{2} + \alpha N_{j1} \\ &+ \sqrt{\frac{P_{3-j}}{P_j}} \sin(\theta + \Phi_{3-j0}(s - \tau_1) - \Phi_j(s) - C) - \Phi_{j0s}. \end{aligned} \quad (17)$$

The left hand side admits a constant as a nontrivial solution. In order to obtain a bounded solution for  $\Phi_{j1}$ , the right hand side needs to satisfy the solvability condition ( $j = 1, 2$ )

$$\lim_{t \rightarrow \infty} \frac{1}{t} \int_0^t F_j(t, s) ds = 0. \quad (18)$$

This condition leads to two delay-coupled Adler equations given by

$$\begin{aligned} \frac{d\Phi_{10}}{ds} &= -\frac{\Delta_1}{2} - \alpha \sqrt{\frac{P_2}{P_1}} \cos(\theta + \Phi_{20}(s - \tau_1) - \Phi_{10}(s) - C) \\ &\quad + \sqrt{\frac{P_2}{P_1}} \sin(\theta + \Phi_{20}(s - \tau_1) - \Phi_{10}(s) - C), \end{aligned} \quad (19)$$

$$\begin{aligned} \frac{d\Phi_{20}}{ds} &= \frac{\Delta_1}{2} - \alpha \sqrt{\frac{P_1}{P_2}} \cos(\theta + \Phi_{10}(s - \tau_1) - \Phi_{20}(s) - C) \\ &\quad + \sqrt{\frac{P_1}{P_2}} \sin(\theta + \Phi_{10}(s - \tau_1) - \Phi_{20}(s) - C). \end{aligned} \quad (20)$$

Combining the trigonometric functions and using the original variables and parameters, Eqs. (19)-(20) become

$$\frac{d\Phi_1}{dt} = -\frac{\Delta}{2} + \varepsilon \sqrt{\frac{P_2}{P_1}} (1 + \alpha^2) \sin(\theta_0 + \Phi_2(t - \tau) - \Phi_1), \quad (21)$$

$$\frac{d\Phi_2}{dt} = \frac{\Delta}{2} + \varepsilon \sqrt{\frac{P_1}{P_2}} (1 + \alpha^2) \sin(\theta_0 + \Phi_1(t - \tau) - \Phi_2). \quad (22)$$

where

$$\theta_0 \equiv \theta - C - \arctan(\alpha). \quad (23)$$

## 2 Compound Laser Modes if $P_2/P_1 \ll 1$

The compound laser modes (CLMs) are the solutions of Eqs. (21) and (22) of the form

$$\Phi_1 = \omega t, \quad \Phi_2 = \omega t + \sigma. \quad (24)$$

Inserting (24) into Eqs. (21) and (22) leads to two equations for  $\omega$  and  $\sigma$  given by

$$\omega = -\frac{\Delta}{2} + \varepsilon \sqrt{\frac{P_2}{P_1}} (1 + \alpha^2) \sin(\theta_0 - \omega\tau + \sigma), \quad (25)$$

$$\omega = \frac{\Delta}{2} + \varepsilon \sqrt{\frac{P_1}{P_2}} (1 + \alpha^2) \sin(\theta_0 - \omega\tau - \sigma). \quad (26)$$

Eliminating  $\sigma$ , the solution for  $\omega = \omega(\Delta)$  is obtained by solving the following quadratic equation for  $\Delta = \Delta(\omega)$

$$\frac{\Delta^2}{4} (F_-^2 C_1 + F_+^2 C_2) + \Delta \omega F_+ F_- (C_1 + C_2) + \omega^2 (F_+^2 C_1 + F_-^2 C_2) - 4\varepsilon^2 (1 + \alpha^2) = 0 \quad (27)$$

where

$$F_{\pm} \equiv \sqrt{\frac{P_1}{P_2}} \pm \sqrt{\frac{P_2}{P_1}}, \quad C_1 \equiv \frac{1}{\sin^2(\theta_0 - \omega\tau)}, \quad \text{and} \quad C_2 \equiv \frac{1}{\cos^2(\theta_0 - \omega\tau)}. \quad (28)$$

The condition for having real roots is provided by the discriminant

$$\omega^2 F_+^2 F_-^2 (C_1 + C_2)^2 - (F_-^2 C_1 + F_+^2 C_2) \left[ \begin{array}{c} \omega^2 (F_+^2 C_1 + F_-^2 C_2) \\ -4\varepsilon^2 (1 + \alpha^2) \end{array} \right] \geq 0 \quad (29)$$

Eq. (29) sequentially simplifies as

$$\begin{aligned} & \left\{ \begin{array}{c} \omega^2 \left[ \begin{array}{c} F_+^2 F_-^2 (C_1^2 + C_2^2 + 2C_1 C_2) - F_-^2 F_+^2 C_1^2 \\ -F_-^4 C_1 C_2 - F_+^4 C_2 C_1 - F_-^2 F_+^2 C_2^2 \\ +4\varepsilon^2 (1 + \alpha^2) (F_-^2 C_1 + F_+^2 C_2) \end{array} \right] \end{array} \right\} \geq 0, \\ & \left\{ \begin{array}{c} \omega^2 \left[ \begin{array}{c} F_+^2 F_-^2 (2C_1 C_2) - F_-^4 C_1 C_2 - F_+^4 C_2 C_1 \\ +4\varepsilon^2 (1 + \alpha^2) (F_-^2 C_1 + F_+^2 C_2) \end{array} \right] \end{array} \right\} \geq 0, \\ & -C_1 C_2 \omega^2 [F_+^2 - F_-^2]^2 + 4\varepsilon^2 (1 + \alpha^2) (F_-^2 C_1 + F_+^2 C_2) \geq 0, \\ & -16C_1 C_2 \omega^2 + 4\varepsilon^2 (1 + \alpha^2) (F_-^2 C_1 + F_+^2 C_2) \geq 0. \end{aligned} \quad (30)$$

Introducing

$$x \equiv P_2/P_1 \quad (31)$$

into Eq. (30), we find

$$-16C_1 C_2 \omega^2 + 4\varepsilon^2 (1 + \alpha^2) \left( \left( \frac{1}{x} - 2 + x \right) C_1 + \left( \frac{1}{x} + 2 + x \right) C_2 \right) \geq 0, \quad (32)$$

or equivalently, the following quadratic equation for  $x$

$$\begin{aligned} x^2 + x \left[ \frac{4\varepsilon^2 (1 + \alpha^2) 2(C_2 - C_1) - 16C_1 C_2 \omega^2}{4\varepsilon^2 (1 + \alpha^2) (C_1 + C_2)} \right] + 1 & \geq 0, \\ x^2 + x \left[ \frac{2(C_2 - C_1)}{C_1 + C_2} - \frac{16C_1 C_2 \omega^2}{4\varepsilon^2 (1 + \alpha^2) (C_1 + C_2)} \right] + 1 & \geq 0, \\ x^2 + x \left[ 2(\sin^2(\theta_0 - \omega\tau)) - \cos^2(\theta_0 - \omega\tau) - \frac{4\omega^2}{\varepsilon^2 (1 + \alpha^2)} \right] + 1 & \geq 0, \\ x^2 + x \left[ -2\cos(2(\theta_0 - \omega\tau)) - \frac{4\omega^2}{\varepsilon^2 (1 + \alpha^2)} \right] + 1 & \geq 0. \end{aligned} \quad (33)$$

By gradually changing  $\omega\tau$  from  $\omega\tau = -1.5$  to  $\omega\tau = 1.5$ , we determine the real roots of the quadratic equation

$$x^2 + x \left[ -2\cos(2(\theta_0 - \omega\tau)) - \frac{4\omega^2}{\varepsilon^2 (1 + \alpha^2)} \right] + 1 = 0. \quad (34)$$

They delimit the domain of real solutions for  $\Delta = \Delta(\omega)$ . From Eq. (34) and assuming  $\omega^2 = O(x^{-1})$ , we find the limit

$$\omega_{\pm}\tau \rightarrow \pm \frac{\varepsilon\tau}{2} \sqrt{(1 + \alpha^2) \frac{P_1}{P_2}} \quad \text{as } x \rightarrow 0. \quad (35)$$

The corresponding values of  $\Delta$  are given by

$$\Delta_{\pm} = -2\omega_{\pm}. \quad (36)$$

Solving the quadratic equation (27) and then taking the limit  $P_2/P_1 \rightarrow 0$  leads to

$$\Delta \rightarrow -2\omega \pm \frac{4P_2}{P_1} \sqrt{\frac{4}{C_1 C_2} (\omega_+ - \omega) (\omega - \omega_-)} \quad (37)$$

which implies that the CLM frequency is

$$\omega = -\frac{\Delta}{2} \quad (2\omega_- \leq \Delta \leq 2\omega_+) \quad (38)$$

in first approximation.

### 3 Stability of the CLMs if $P_2/P_1 \ll 1$

From Eqs. (21) and (22), we determine the linearized equations for the CLMs (24). By considering small perturbations proportional to  $\exp(\lambda t)$ , we find that the growth rate  $\lambda$  satisfies the characteristic equation

$$\left\{ \begin{aligned} &\lambda^2 + \lambda \varepsilon \sqrt{(1 + \alpha^2)} \left[ \begin{aligned} &\sqrt{\frac{P_2}{P_1}} \cos(\theta_0 - \omega\tau + \sigma) \\ &+ \sqrt{\frac{P_1}{P_2}} \cos(\theta_0 - \omega\tau - \sigma) \end{aligned} \right] \\ &+ \left[ \begin{aligned} &\varepsilon^2 (1 + \alpha^2) \cos(\theta_0 - \omega\tau + \sigma) \\ &\times \cos(\theta_0 - \omega\tau - \sigma) (1 - \exp(-2\lambda\tau)) \end{aligned} \right] \end{aligned} \right\} = 0 \quad (39)$$

We determine the solution of Eq. (39) in the limit  $P_2/P_1 \rightarrow 0$ . We know from Eq. (35) that the frequency  $\omega$  scales like  $\varepsilon \sqrt{P_1/P_2}$ . It motivates to scale  $\lambda$  as

$$\lambda = \varepsilon \sqrt{\frac{P_1}{P_2}} \Lambda. \quad (40)$$

In terms of  $\Lambda$ , Eq. (39) can be rewritten as

$$\left\{ \begin{aligned} &\varepsilon^2 \frac{P_1}{P_2} \Lambda^2 + \varepsilon^2 \frac{P_1}{P_2} \Lambda \sqrt{(1 + \alpha^2)} \left[ \begin{aligned} &\frac{P_2}{P_1} \cos(\theta_0 - \omega\tau + \sigma) \\ &+ \cos(\theta_0 - \omega\tau - \sigma) \end{aligned} \right] \\ &+ \left[ \begin{aligned} &\varepsilon^2 (1 + \alpha^2) \cos(\theta_0 - \omega\tau + \sigma) \\ &\times \cos(\theta_0 - \omega\tau - \sigma) \left( 1 - \exp(-2\varepsilon \sqrt{\frac{P_1}{P_2}} \Lambda \tau) \right) \end{aligned} \right] \end{aligned} \right\} = 0 \quad (41)$$

In the limit  $P_2/P_1 \rightarrow 0$ , the two first terms of Eq. (41) dominate and we obtain

$$\Lambda = -\sqrt{(1 + \alpha^2)} [\cos(\theta_0 - \omega\tau - \sigma)], \quad (42)$$

in first approximation. Stability (instability) now means the condition

$$\cos(\theta_0 - \omega\tau - \sigma) > 0 \quad (\cos(\theta_0 - \omega\tau - \sigma) < 0). \quad (43)$$

The condition

$$\cos(\theta_0 - \omega\tau - \sigma) = 0 \quad (44)$$

corresponds to  $\Lambda = 0$  and characterizes the limit points of the CLM orbits. We next wish to relate this condition to the bifurcation diagram of the CLMs. Taking the derivative of Eqs. (25) and (26) with respect to  $\Delta$ , we find

$$\frac{d\omega}{d\Delta} = -\frac{1}{2} + \sqrt{\frac{P_2}{P_1}} H_1 \left( -\tau \frac{d\omega}{d\Delta} + \frac{d\sigma}{d\Delta} \right), \quad (45)$$

$$\frac{d\omega}{d\Delta} = \frac{1}{2} + \sqrt{\frac{P_1}{P_2}} H_2 \left( -\tau \frac{d\omega}{d\Delta} - \frac{d\sigma}{d\Delta} \right). \quad (46)$$

where

$$H_1 \equiv \varepsilon \sqrt{\frac{P_2}{P_1}} (1 + \alpha^2) \cos(\theta_0 - \omega\tau + \sigma), \quad (47)$$

$$H_2 \equiv \varepsilon \sqrt{\frac{P_1}{P_2}} (1 + \alpha^2) \cos(\theta_0 - \omega\tau - \sigma). \quad (48)$$

Multiplying Eqs. (45) and (46) by  $d\Delta/d\omega$  and reorganizing lead to two linear equations for  $d\Delta/d\omega$  and  $d\sigma/d\omega$

$$\frac{1}{2} \frac{d\Delta}{d\omega} = -1 + H_1 \left( -\tau + \frac{d\sigma}{d\omega} \right), \quad (49)$$

$$\frac{1}{2} \frac{d\Delta}{d\omega} = 1 - H_2 \left( -\tau - \frac{d\sigma}{d\omega} \right). \quad (50)$$

Solving those equations, we obtain for  $d\Delta/d\omega$

$$\frac{d\Delta}{d\omega} = \frac{2}{H_1 - H_2} [H_1 + H_2 + 2\varepsilon\tau H_1 H_2] \quad (51)$$

Eq. (51) is valid for arbitrary values of the pump parameters. It provide the slope of the CLM curve  $\omega = \omega(\Delta)$ . A limit point (or saddle-node bifurcation point) of the CLM orbit satisfies the condition  $d\Delta/d\omega = 0$ . In order to relate this condition to Eq. (44), we analyze Eq. (51) in the limit  $P_2/P_1 \rightarrow 0$ . In this limit,  $H_2 \sim \sqrt{P_1/P_2} \rightarrow \infty$  and (51) simplifies as

$$\frac{d\Delta}{d\omega} = -2. \quad (52)$$

But a different limit is however possible if

$$\cos(\theta_0 - \omega\tau - \sigma) = O\left(\frac{P_2}{P_1}\right) \rightarrow 0 \text{ as } P_2/P_1 \rightarrow 0. \quad (53)$$

In this limit, both  $H_1$  and  $H_2$  are  $O(\sqrt{P_2/P_1})$  small quantities and (51) simplifies as

$$\frac{d\Delta}{d\omega} = \frac{2}{H_1 - H_2} (H_1 + H_2) \quad (54)$$

The condition  $d\Delta/d\omega = 0$  now implies  $H_1 + H_2 = 0$ . The necessary condition is however (53) which clearly matches (44) in first approximation.

## 4 The critical case if $P_2/P_1 \rightarrow 0$

We now consider the case  $P_1 = O(1)$  and  $|P_2|$  small. Physically, we expect that Laser 1 acts as a Master laser injecting its signal into Laser 2 being the Slave laser. In this section, we first show that there is a critical scaling between  $P_2$  and  $\varepsilon$  for which our previous asymptotic solution assuming  $P_j = O(1)$  ( $j = 1, 2$ ) becomes invalid. After evaluating the critical scalings of all variables and parameters with respect to  $\varepsilon$ , we plan to develop a new asymptotic theory valid in the limit  $\varepsilon \rightarrow 0$ .

Inserting (16) into (8) for  $j = 2$ , we find that the long time solution for  $R_2$  is given by

$$R_2 = P_2^{1/2} + \varepsilon \frac{(1 + 2P_2)P_1^{1/2}}{2P_2} \cos(\theta + \Phi_{10}(s - \tau_1) - \Phi_{20}(s) - C). \quad (55)$$

If  $|P_2| \rightarrow 0$ , the two terms perturbation expansion becomes non uniform as soon as

$$P_2^{3/2} \sim \varepsilon, \quad (56)$$

or equivalently, if

$$P_2 \sim \varepsilon^{2/3}. \quad (57)$$

With (57), Eq. (55) then indicates that

$$R_2 \sim P_2^{1/2} \sim \varepsilon^{1/3}. \quad (58)$$

Using (15) and (9), we determine the scalings for the  $N_j$  as

$$N_1 \sim \varepsilon \sqrt{P_2} \sim \varepsilon^{4/3}, \quad N_2 \sim \frac{\varepsilon}{\sqrt{P_2}} \sim \varepsilon^{2/3}. \quad (59)$$

Last, we learn from (35) and (36) that  $\omega$  and  $\Delta$  follow the scalings

$$\omega \sim \varepsilon^{2/3} \text{ and } \Delta \sim \varepsilon^{2/3}. \quad (60)$$

We are now ready for a new asymptotic analysis. We first define the new parameters  $p_2$ , and  $\Delta_2$  as

$$P_2 = \varepsilon^{2/3} p_2, \quad \Delta = \varepsilon^{2/3} \Delta_2, \quad (61)$$

and introduce the new variables  $r_1$ ,  $r_2$ ,  $n_1$ , and  $n_2$  defined by

$$R_1 = \sqrt{P_1} + \varepsilon^{4/3} r_1, \quad R_2 = \varepsilon^{1/3} r_2, \quad N_1 = \varepsilon^{4/3} n_1, \quad \text{and } N_2 = \varepsilon^{2/3} n_2 \quad (62)$$

Inserting (61) and (62) into Eqs. (1)-(6), we obtain

$$r'_1 = \left[ n_1 \sqrt{P_1} + r_2(t - \tau) \cos(\theta + \Phi_2(t - \tau) - \Phi_1 - C) \right] + \dots \quad (63)$$

$$\Phi'_1 = \varepsilon^{2/3} \left( -\frac{\Delta_2}{2} \right) + \varepsilon^{4/3} \left[ + \frac{r_2(t - \tau)}{\sqrt{P_1}} \sin(\theta + \Phi_2(t - \tau) - \Phi_1 - C) \right] + \dots \quad (64)$$

$$Tn'_1 = -2\sqrt{P_1}r_1 - n_1(1 + 2P_1) + \dots, \quad (65)$$

$$r'_2 = \varepsilon^{2/3} \left[ n_2 r_2 + \sqrt{P_1} \cos(\theta + \Phi_1(t - \tau) - \Phi_2 - C) \right] + \dots, \quad (66)$$

$$\Phi'_2 = \varepsilon^{2/3} \left[ \frac{\Delta_2}{2} + \alpha n_2 + \frac{\sqrt{P_1}}{r_2} \sin(\theta + \Phi_1(t - \tau) - \Phi_2 - C) \right] + \dots, \quad (67)$$

$$Tn'_2 = p_2 - n_2 - r_2^2 + \dots \quad (68)$$

We now seek a two time solution of the form

$$r_1 = r_{10}(t, s) + \varepsilon^{2/3} r_{11}(t, s) + \dots \quad (69)$$

$$r_2 = r_{20}(t, s) + \varepsilon^{2/3} r_{21}(t, s) + \dots \quad (70)$$

$$n_1 = n_{10}(t, s) + \varepsilon^{2/3} n_{11}(t, s) + \dots \quad (71)$$

$$n_2 = n_{20}(t, s) + \varepsilon^{2/3} n_{21}(t, s) + \dots \quad (72)$$

$$\Phi_j = \Phi_{j0}(t, s) + \varepsilon^{2/3} \Phi_{j1}(t, s) + \dots \quad (73)$$

where  $s \equiv \varepsilon^{2/3}t$  is defined as a new slow time variable. This variable is motivated by the right hand sides of Eqs. (64), (66) and (67) indicating that  $r_2$  and the phases  $\Phi_j$  are, in first approximation, functions of  $s$ .

We now proceed as in Section 1. The leading order problem is  $O(1)$  and is given by

$$r_{10t} = n_{10} \sqrt{P_1} + r_{20}(t - \tau) \cos(\theta + \Phi_{20}(t - \tau) - \Phi_{10} - C), \quad (74)$$

$$\Phi_{10t} = r_{20t} = \Phi_{20t} = 0 \quad (75)$$

$$Tn_{10t} = -2\sqrt{P_1}r_{10} - n_{10}(1 + 2P_1), \quad (76)$$

$$Tn_{20t} = p_2 - n_{20} - r_{20}^2. \quad (77)$$

Eq. (75) tells us that  $\Phi_{10}$ ,  $r_{20}$ , and  $\Phi_{20}$  are all three functions of the slow time  $s$ . Recall that the delay  $\tau$  was scaled like  $\tau = \varepsilon^{-1}\tau_1$  in Section 1. Eq. (74) then becomes

$$r_{10t} = n_{10} \sqrt{P_1} + r_{20}(s - \varepsilon^{-1/3}\tau_1) \cos(\theta + \Phi_{20}(s - \varepsilon^{-1/3}\tau_1) - \Phi_{10}(s) - C). \quad (78)$$

Eqs. (78) and (76) are two coupled equations for  $r_1$  and  $n_1$ . Because the second term in the right hand side of Eq. (78) is slowly varying,  $r_1$  and  $n_1$  quickly approach their quasi steady state values on the  $t$  time scale. They are

$$n_{10} = -\frac{r_{20}(s - \varepsilon^{-1/3}\tau_1)}{\sqrt{P_1}} \cos(\theta + \Phi_{20}(s - \varepsilon^{-1/3}\tau_1) - \Phi_{10}(s) - C), \quad (79)$$

$$r_{10} = -\frac{n_{10}(1 + 2P_1)}{2\sqrt{P_1}}. \quad (80)$$



Similarly,  $r_{20}^2$  in the right hand side of Eq. (77) is a slowly varying function of  $s$  and  $n_{20}$  is quickly converging to its quasi steady state on the  $t$  time scale. The latter is given by

$$n_{20} = p_2 - r_{20}^2. \quad (81)$$

The next problem for  $\Phi_{11}$ ,  $r_{21}$ , and  $\Phi_{21}$  is  $O(\varepsilon^{2/3})$  and is given by

$$\Phi_{11t} = -\Phi_{10s} - \frac{\Delta_2}{2}, \quad (82)$$

$$r_{21t} = -r_{20s} + n_2 r_2 + \sqrt{P_1} \cos(\theta + \Phi_1(s - \varepsilon^{-1/3} \tau_1) - \Phi_2(s) - C), \quad (83)$$

$$\Phi_{21t} = -\Phi_{20s} + \frac{\Delta_2}{2} + \alpha n_2 + \frac{\sqrt{P_1}}{r_2} \sin \left( \begin{array}{c} (\theta + \Phi_1(s - \varepsilon^{-1/3} \tau_1) \\ -\Phi_2(s) - C \end{array} \right). \quad (84)$$

Solvability of these equations requires the three conditions

$$\frac{d\Phi_{10}}{ds} = -\frac{\Delta_2}{2}, \quad (85)$$

$$\frac{dr_{20}}{ds} = n_2 r_2 + \sqrt{P_1} \cos(\theta + \Phi_1(s - \varepsilon^{-1/3} \tau_1) - \Phi_2(s) - C), \quad (86)$$

$$\frac{d\Phi_{20}}{ds} = \frac{\Delta_2}{2} + \alpha n_2 + \frac{\sqrt{P_1}}{r_2} \sin(\theta + \Phi_1(s - \varepsilon^{-1/3} \tau_1) - \Phi_2(s) - C). \quad (87)$$

The solution of Eq. (85) with  $\Phi_{10}(0) = 0$  is

$$\Phi_{10} = -\frac{\Delta_2}{2}s. \quad (88)$$

With (88), Eqs. (86) and (87) become

$$\frac{dr_{20}}{ds} = n_2 r_2 + \sqrt{P_1} \cos(\theta_1 - \bar{\Phi}_{20}) \quad (89)$$

$$\frac{d\bar{\Phi}_{20}}{ds} = \Delta_2 + \alpha n_2 + \frac{\sqrt{P_1}}{r_2} \sin(\theta_1 - \bar{\Phi}_{20}) \quad (90)$$

where

$$\theta_1 \equiv \theta + \frac{\Delta_2}{2} \varepsilon^{-1/3} \tau_1 - C \quad (91)$$

$$\bar{\Phi}_{20} \equiv \Phi_{20} + \frac{\Delta_2}{2}s \quad (92)$$

Together with (81), Eqs. (89) and (90) are the equations of a laser subject to an injected signal.

We now verify that the steady state solutions of Eqs. (89) and (90) corresponds to the CLMs, previously defined by (24). The steady state solutions of Eqs. (89) and (90) corresponds to  $r_2$  constant and  $\bar{\Phi}_{20} = \sigma$  constant. Using (92), we determine  $\Phi_{20}$  as

$$\Phi_{20} = -\frac{\Delta_2}{2}s + \sigma = -\frac{\Delta t}{2} + \sigma. \quad (93)$$

The original phase  $\Phi_{20}$  exhibits the frequency

$$\omega = -\frac{\Delta}{2} \tag{94}$$

which is the CLM frequency as  $P_2/P_1 \rightarrow 0$  given by (38).

## References

- [1] D. Lenstra, Self-consistency rate-equation theory of coupling in mutually injected semiconductor lasers, Proc SPIE 10098, Physics and Simulation of Optoelectronic Devices XXV, 100980K (2017)
